# Supplementary material
Source: PubMed Central journal article supplement (PMC5572676)
Supplement: NIHMS889180-supplement-Supplementary_Material.pdf [file NIHMS889180-supplement-Supplementary_Material.pdf]

# Histochemistry and Cell Biology

## Electronic Supplementary Material

### **Prolonged overexpression of *Wnt10b* induces epidermal keratinocyte transformation through activating *EGF* pathway**

**Mingxing Lei · Xiangdong Lai · Xiufeng Bai · Weiming Qiu · Tian Yang · Xiaoling Liao · Cheng-Ming Chuong · Li Yang · Julia Li Zhong · Xiaohua Lian**

M. Lei and X. Lai have contributed equally to this work.

M. Lei · X. Lai · X. Bai · W. Qiu · T. Yang · X. Lian (✉)

Department of Cell Biology, the Third Military Medical University, Chongqing 400038, People's Republic of China

e-mail: [129hx@sina.com](mailto:129hx@sina.com)

L. Yang · J.L. Zhong (✉)

Key Laboratory of Biorheological Science and Technology, Ministry of Education, Bioengineering College, Chongqing

University, Chongqing 400044, People's Republic of China; '111' Project Laboratory of Biomechanics and Tissue Repair,

Bioengineering College, Chongqing University, Chongqing 400044, People's Republic of China

e-mail: [jlzhong@cqu.edu.cn](mailto:jlzhong@cqu.edu.cn)

X. Liao

Institute of Biomedical Engineering, Chongqing University of Science and Technology, Chongqing 401331, People's

Republic of China

C.M. Chuong

Department of Pathology, Keck School of Medicine, University of Southern California, Los Angeles, California, USA.

## Supplementary figures and legends

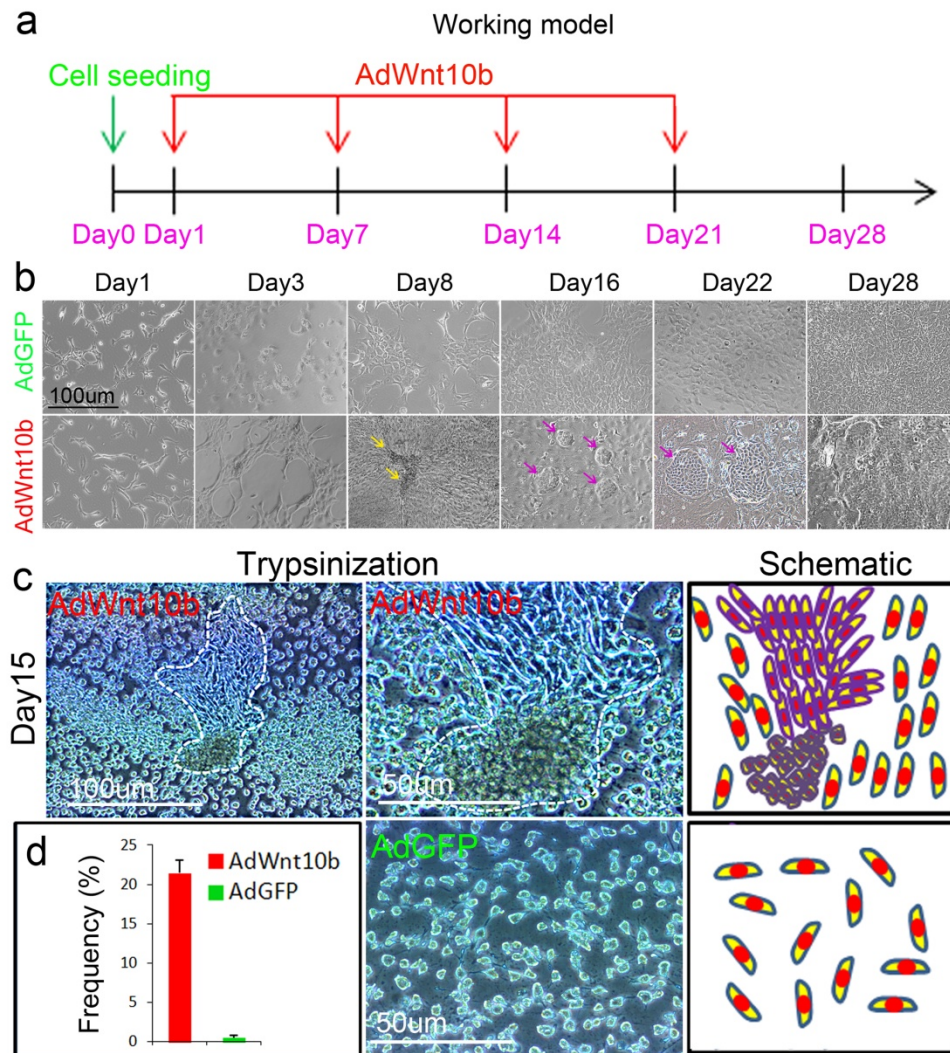

**Fig. S1** Stepwise transformation of JB6P- cells after AdWnt10b treatment. a. Working model showed timing of 4 doses of AdWnt10b treatments. b. Low-power view images related to Figure 2a showed stepwise cell transformation during AdWnt10b treatments. c. Phase-contrast microscopy and schematic drawing showed different cell shapes digested with trypsin at day 15 after treatment with 3 doses of AdWnt10b. d. The incidence of cell

transformation frequency was almost 100% about 21.3% in supernatant treatment assay.  $n >$

5.  $P < 0.05$ .

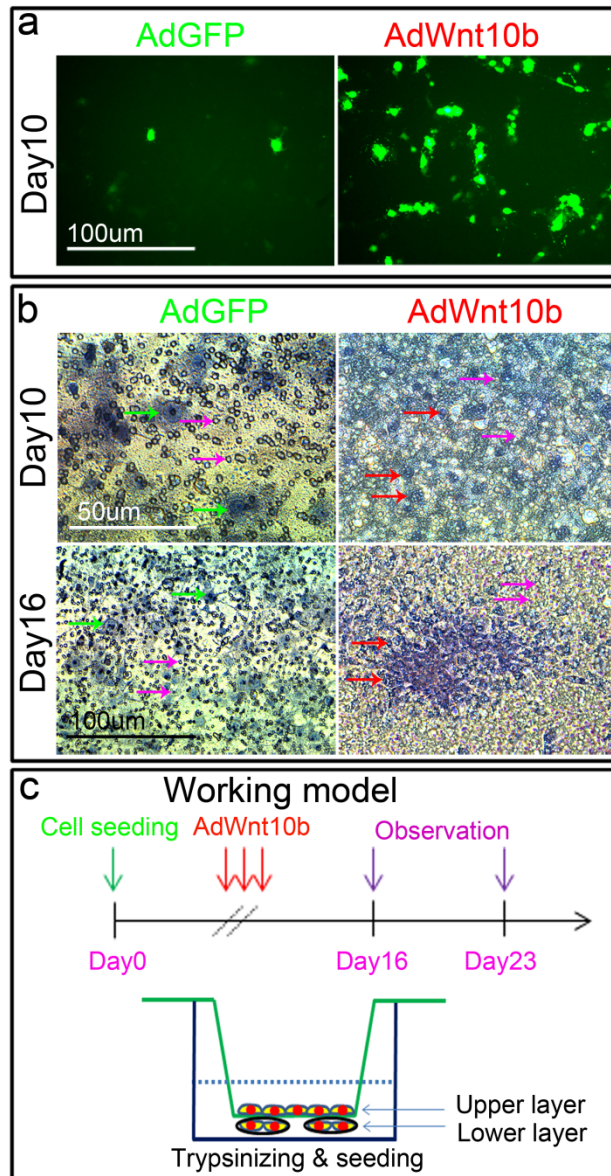

**Fig. S2** Invasive ability of JB6P- cells was enhanced after 3 doses of AdWnt10 treatment. a. Fluorescent images showed more cells were invaded into the lower part of the transwell culture system in AdWnt10b-treated group 10 days after infection. b. H&E staining revealed

more cells were invaded into the lower part of the transwell culture system at day 10 and form cluster at day16 after 2 or 3 doses of AdWnt10b treatment (Green arrows, AdGFP-induced cells; purple arrows, transwell holes; red arrows, AdWnt10b-induced cells). c. Working model showed timing and culture system for cell seeding, AdWnt10b application and observation.

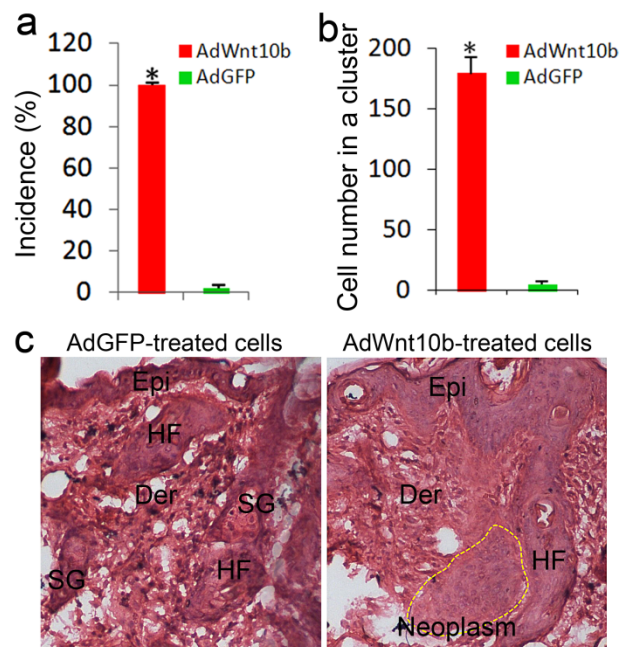

**Fig. S3** ~~Anchorage-independent growth~~–Neoplasm formation of AdWnt10b-treated cells. a. The incidence of cell cluster was 100% in AdWnt10b-treated group. b. The average cell number in one cluster was about 170. c. Neoplasm was observed in nude mouse skin in AdWnt10b-treated group at day 12 after subcutaneous injection. Der, dermis; Epi, epidermis; HF, hair follicle; SG, sebaceous gland. n>5. \*P<0.05.

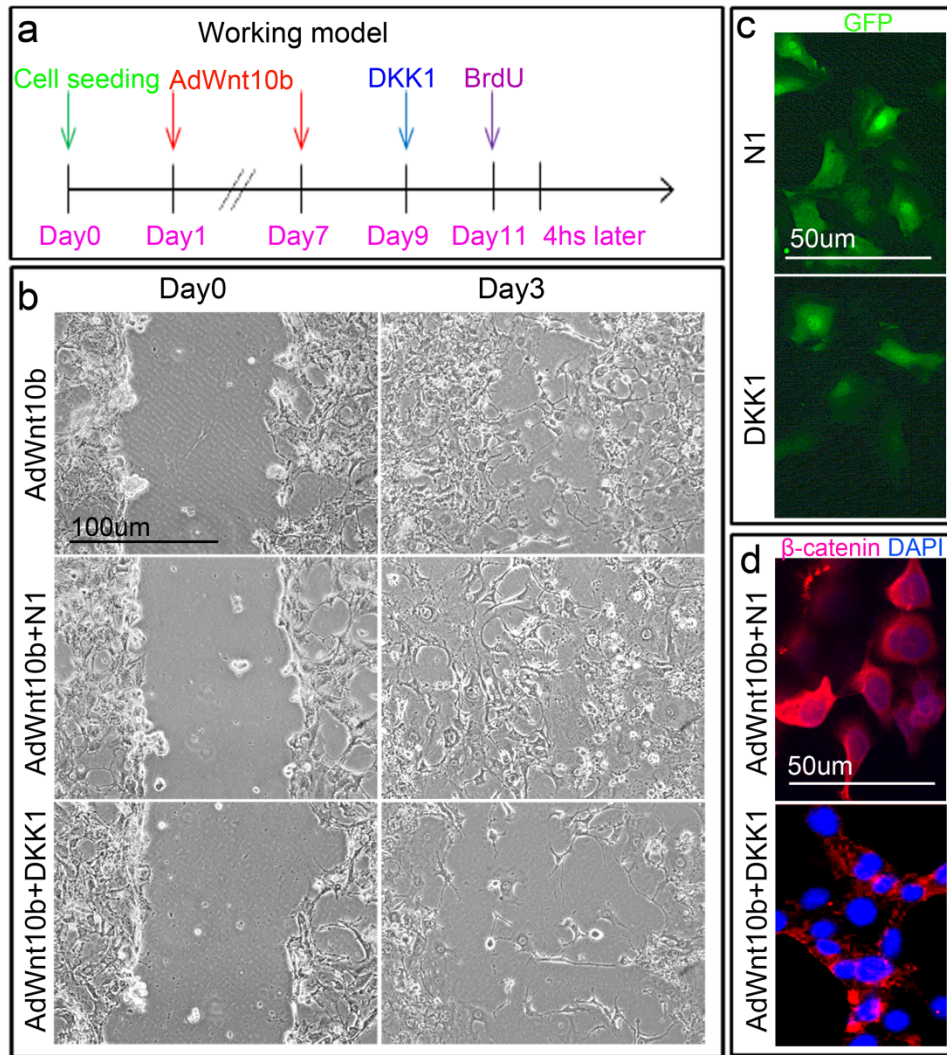

**Fig. S4** Decrease of cell migration and Wnt pathway activation after sequential AdWnt10b+DKK1 treatment. a. Working model showed timing of cell seeding, AdWnt10b and Dkk1 administrations, BrdU application and detection. b. Cell migration rate was decreased in AdWnt10b+DKK1-treated group, when compared to the AdWnt10b or AdWnt10b+N1-treated groups. c. GFP revealed authenticity of Dkk1 plasmid transfection. d.  $\beta$ -catenin was only expressed in the cytoplasm of JB6P- cells after treatment with AdWnt10b+DKK1, when compared to the AdWnt10b+N1 group, which showed fewer nuclear localization of  $\beta$ -catenin.

**Supplementary table**

| <b>Gene name</b>  |     | <b>Primer sequences (5'-3')</b> |
|-------------------|-----|---------------------------------|
| <i>AP-1</i>       | Fwd | TCCCCTATCGACATGGAGTC            |
| <i>AP-1</i>       | Rev | GCTTAAGCTGTGCCACCTGT            |
| <i>Erk1</i>       | Fwd | AGCCCCAGAGATCATGCTTA            |
| <i>Erk1</i>       | Rev | CGGGCCTTCATGTTAATGAT            |
| <i>Erk2</i>       | Fwd | ATCTGTGACTTTGGCCTTGC            |
| <i>Erk2</i>       | Rev | GCTTTCCTGGGAAGATAGGC            |
| <i>IKKb</i>       | Fwd | CTCCCTGACAAGCCTGCTAC            |
| <i>IKKb</i>       | Rev | TTCCTCAGCTGGAAGAAGGA            |
| <i>p65</i>        | Fwd | TTCCTCAGCCATGGTACCTC            |
| <i>p65</i>        | Rev | ACTCCTGGGTCTGTGCTGTT            |
| <i>EGF</i>        | Fwd | CCCAGGCAACGTATCAAAGT            |
| <i>EGF</i>        | Rev | GGTCATACCCAGGAAAGCAA            |
| <i>E-cadherin</i> | Fwd | CGGAGAGGAGAGTCGAAGTG            |
| <i>E-cadherin</i> | Rev | CATGCTCAGCGTCTTCTCTG            |
| <i>Gsk3β</i>      | Fwd | CAAGCAGACACTCCCTGTGA            |
| <i>Gsk3β</i>      | Rev | TGAAACATTGGGCTCTCCTC            |
| <i>β-catenin</i>  | Fwd | TGCAGAAAAATGGTTGCTTTG           |
| <i>β-catenin</i>  | Rev | CCTTCAGCACTCTGCTTGTG            |
| <i>Wnt10b</i>     | Fwd | ATACCCACAACCGCAACTC             |
| <i>Wnt10b</i>     | Rev | CACGATAAACCCCTAGACAGAAA         |
| <i>DKK1</i>       | Fwd | CTGAAGATGAGGAGTGCGGCTC          |
| <i>DKK1</i>       | Rev | GGCTGTGGTCAGAGGGCATG            |
| <i>Mmp2</i>       | Fwd | CAAGTTCCTCCCGCGATGTC            |
| <i>Mmp2</i>       | Rev | TTCTGGTCAAGGTCACCTGTC           |
| <i>Mmp7</i>       | Fwd | CTGCCACTGTCCCAGGAAG             |
| <i>Mmp7</i>       | Rev | GGGAGAGTTTTCCAGTCATGG           |
| <i>Mmp9</i>       | Fwd | CTGGACAGCCAGACACTAAAG           |
| <i>Mmp9</i>       | Rev | CTCGCGGCAAGTCTTCAGAG            |
| <i>Mmp12</i>      | Fwd | GAGTCCAGCCACCAACATTAC           |
| <i>Mmp12</i>      | Rev | GCGAAGTGGGTCAAAGACAG            |
| <i>Timp1</i>      | Fwd | GCAACTCGGACCTGGTCATAA           |
| <i>Timp1</i>      | Rev | CGGCCCGTGATGAGAAACT             |

**Supplementary table 1.** Primers were used in this study. Fwd, forward primer; Rev, reversed primer.
